# Supplementary material
Source: PubMed Central journal article supplement (PMC7735651)
Supplement: ac0c01677_si_001.pdf [file ac0c01677_si_001.pdf]

## Supporting Information

### **Real-time quantitative in-cell NMR: ligand binding and protein oxidation monitored in human cells using multivariate curve resolution**

Enrico Luchinat<sup>a,b,\*</sup>, Letizia Barbieri<sup>a,c</sup>, Timothy F. Campbell<sup>a,†</sup>, Lucia Banci<sup>a,d,\*</sup>

<sup>a</sup> Magnetic Resonance Center – CERM, University of Florence, Via Luigi Sacconi 6, 50019 Sesto Fiorentino, Florence, Italy

<sup>b</sup> Center for Colloids and Surface Science – CSGI, Via della Lastruccia 3, 50019 Sesto Fiorentino, Florence, Italy

<sup>c</sup> Interuniversity Consortium for Magnetic Resonance of Metalloproteins – CIRMMP, Via Luigi Sacconi 6, 50019 Sesto Fiorentino, Florence, Italy

<sup>d</sup> Department of Chemistry “Ugo Schiff”, University of Florence, Via Luigi Sacconi 6, 50019 Sesto Fiorentino, Florence, Italy

† Current affiliation: DuPage lab, University of California, Berkeley, 142 Life Sciences Addition # 3200, Berkeley, CA 94720-3200, USA

\* Corresponding authors:

Enrico Luchinat: [eluchinat@cerm.unifi.it](mailto:eluchinat@cerm.unifi.it);

Lucia Banci: [banci@cerm.unifi.it](mailto:banci@cerm.unifi.it).

## **Table of content**

Supplementary Figures S1-S6



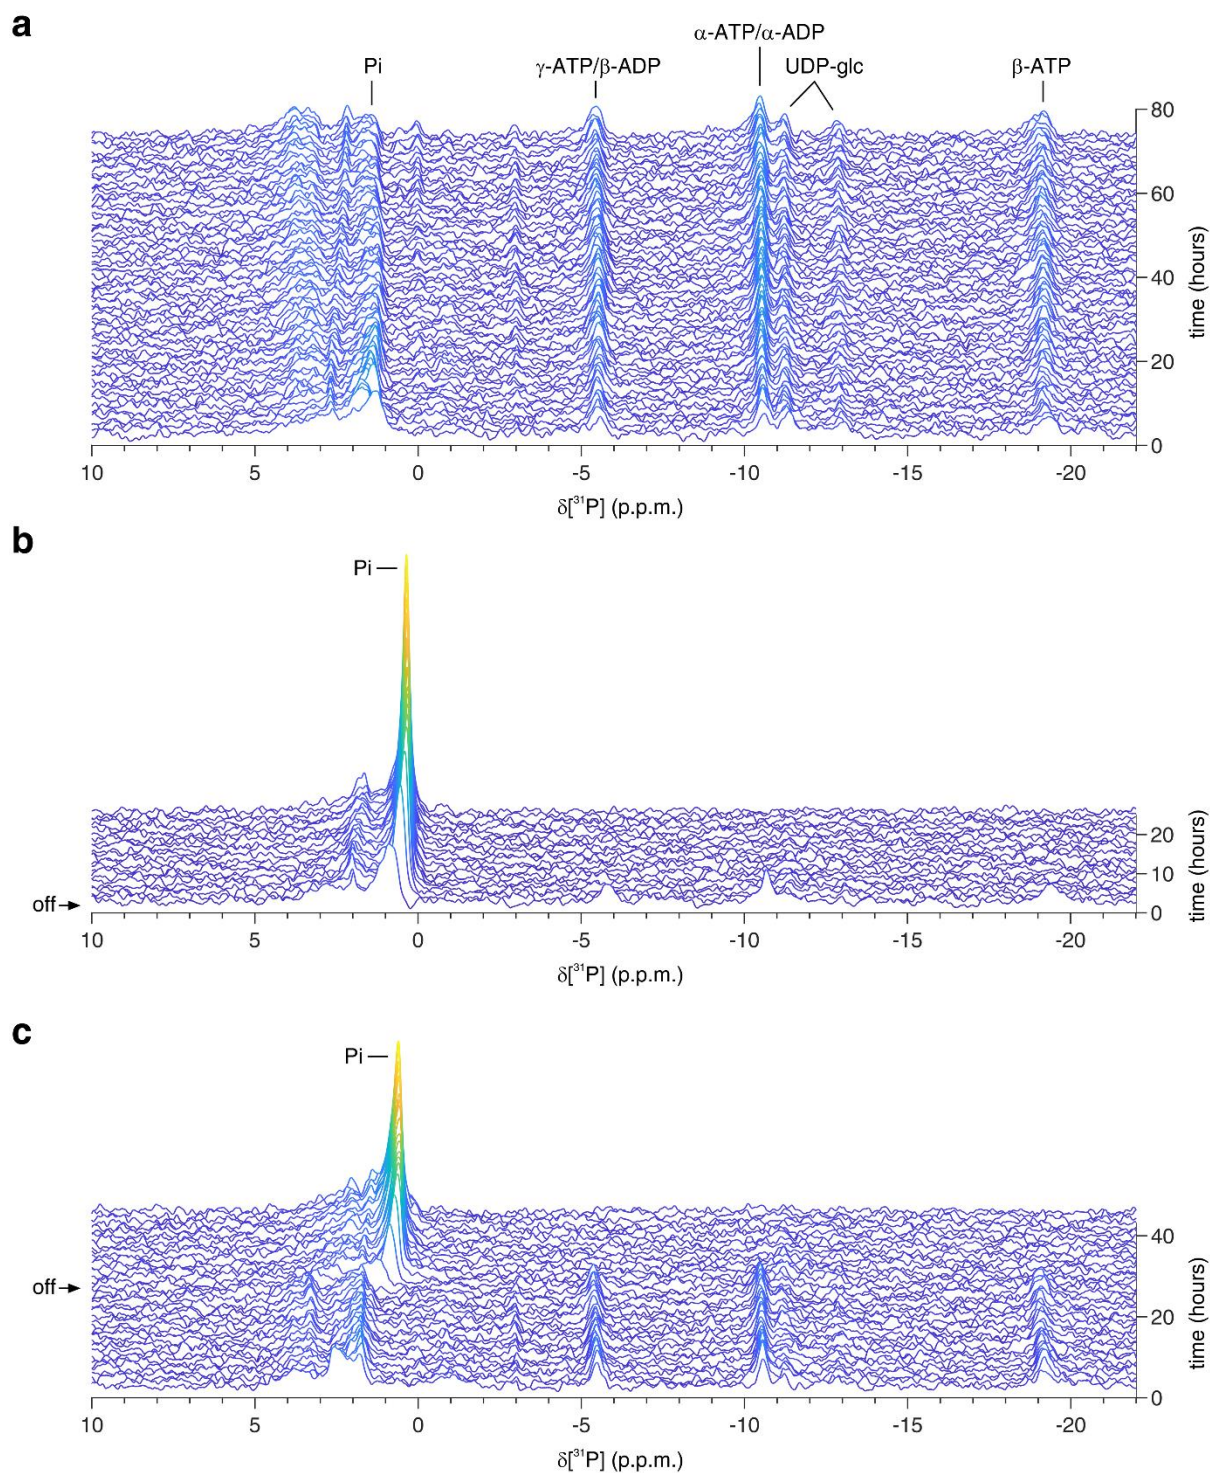

**Figure S2. Real-time  $^{31}\text{P}$  NMR spectra.** Waterfall plots of 1D  $^{31}\text{P}$  NMR spectra of HEK293T cells recorded as a function of time in the NMR bioreactor (a) with constant flow for 72 hours, (b) in the absence of flow for 24 hours, (c) for 42 hours with flow switched off after 24 hours. Spectral intensity (a.u.) is colour-coded from blue (lowest) to yellow (highest). Peaks arising from different  $^{31}\text{P}$  metabolites are annotated.

**Figure S3**

**a**

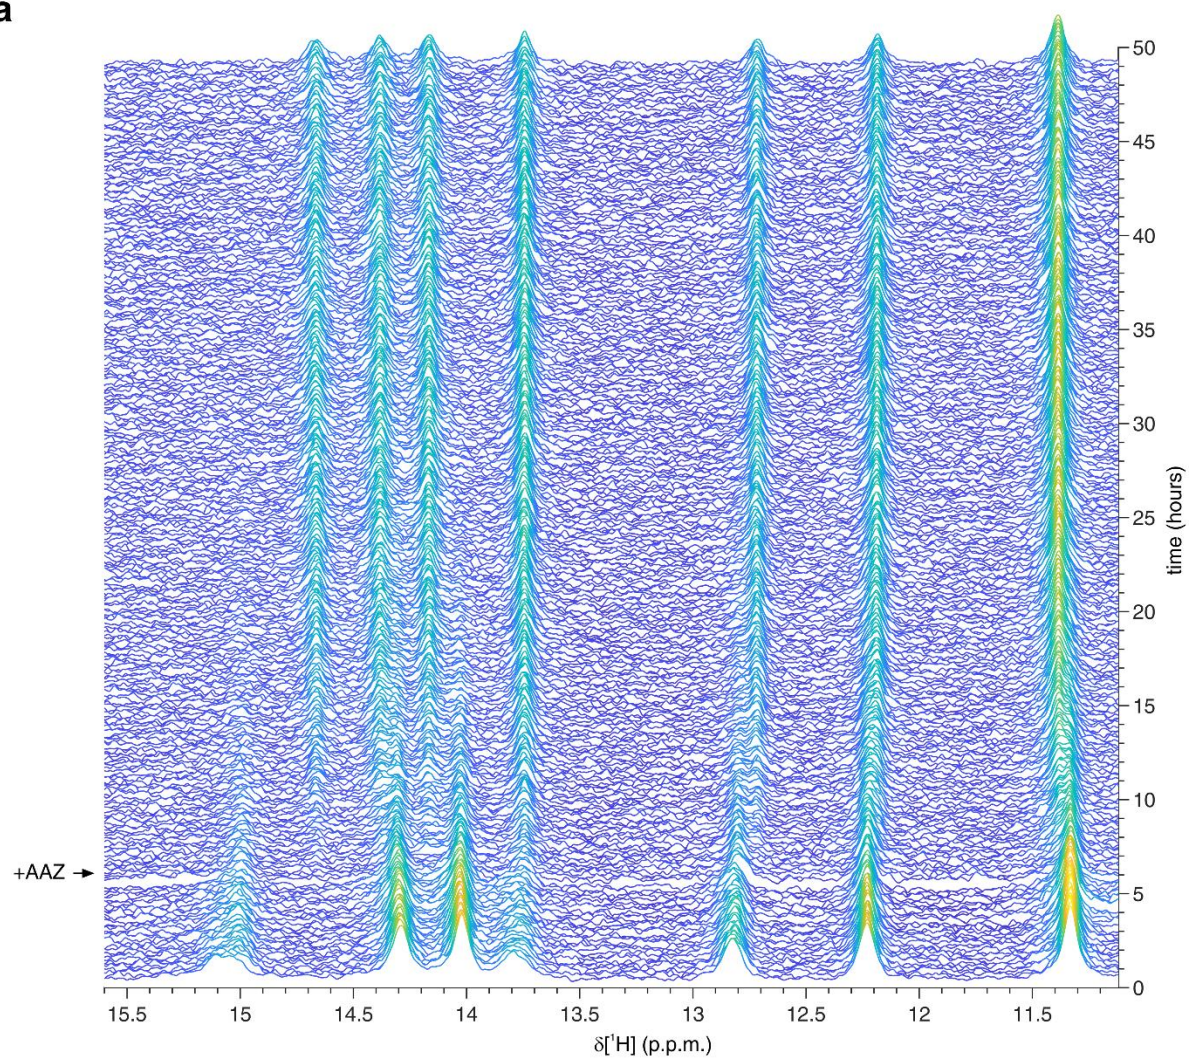

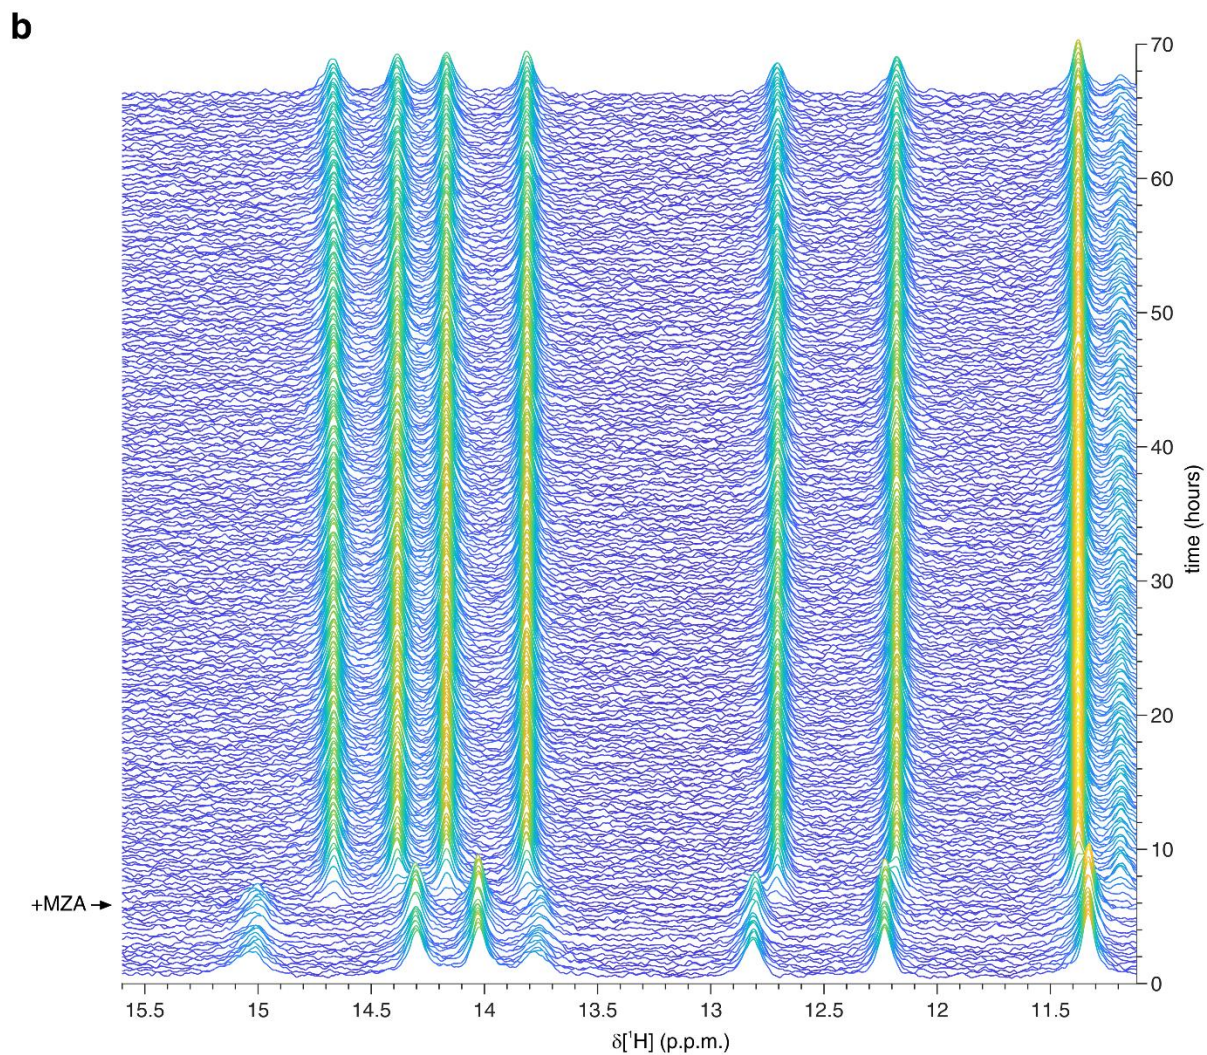

**Figure S3. Real-time in-cell NMR spectra of CA2.** Waterfall plots of 1D  $^1\text{H}$  NMR spectra (region between 15.6 and 11.1 p.p.m.) of intracellular CA2, treated with (a) 25  $\mu\text{M}$  AAZ and (b) 10  $\mu\text{M}$  MZA, recorded as a function of time in the NMR bioreactor. Spectral intensity (a.u.) is colour-coded from blue (lowest) to yellow (highest).

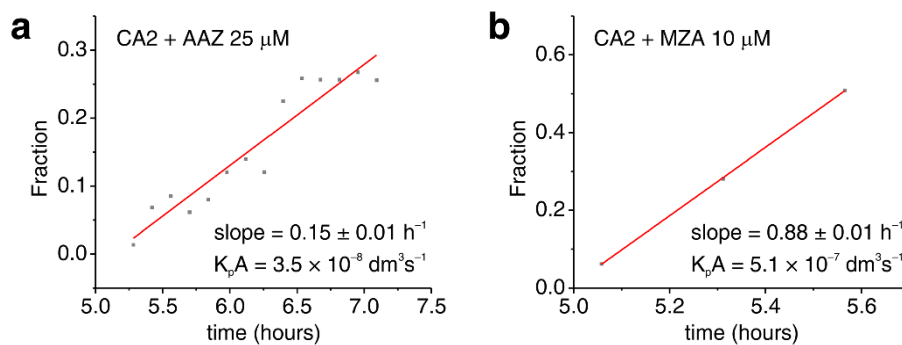

**Figure S4. Permeability coefficients from linear regression of CA2 ligand binding.** Linear regression (red lines) of the initial points (grey dots) of the binding curves from real-time NMR data of intracellular CA2 binding to (a) AAZ and (b) MZA. The permeability coefficients  $\times$  membrane area ( $K_p A$ ) calculated from the slope (see Materials and Methods) are reported in each panel.

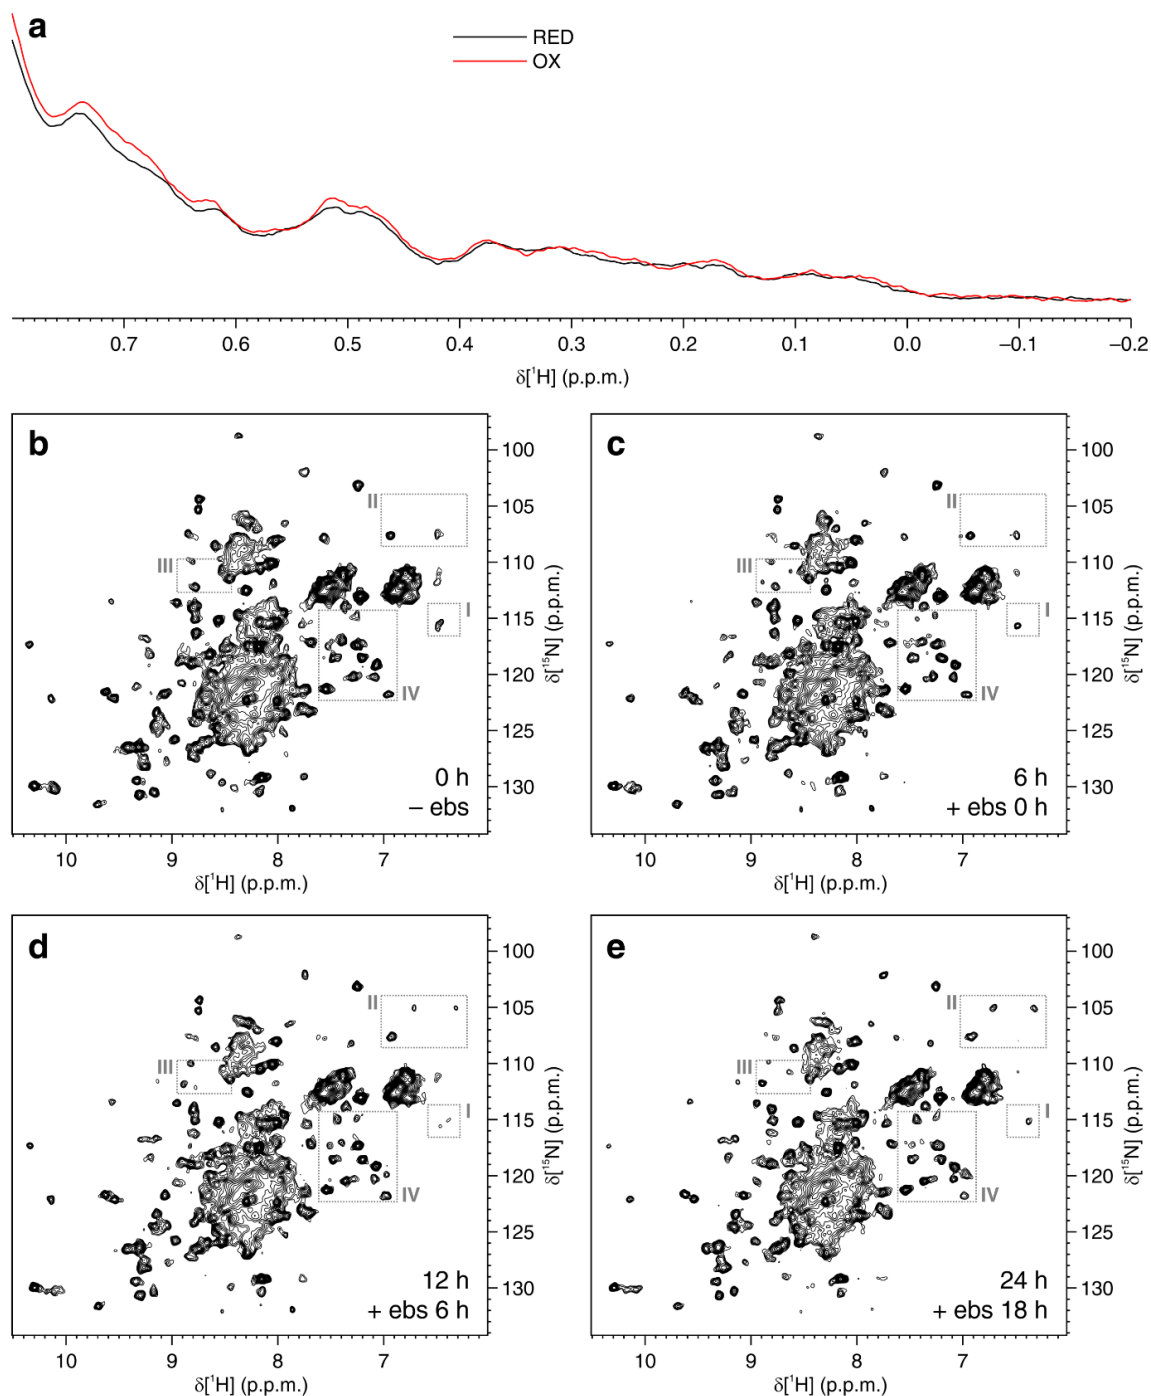

**Figure S5. Real-time in-cell NMR spectra of SOD1.** (a) Representative  $^1\text{H}$  NMR spectra (methyl region between 0.8 and -0.2 p.p.m.) of intracellular disulfide-reduced SOD1 (black) and disulfide-oxidized SOD1 (red) in the NMR bioreactor. (b-e)  $^1\text{H}$ - $^{15}\text{N}$  NMR spectra of intracellular SOD1 in the bioreactor at (b) 0 hours, (c) 6 hours, (d) 12 hours, (e) 24 hours. Time after ebselen treatment is reported in each panel. The spectral regions (I-IV) selected for MCR-ALS analysis (see Figure 4) are indicated as grey dotted rectangles.

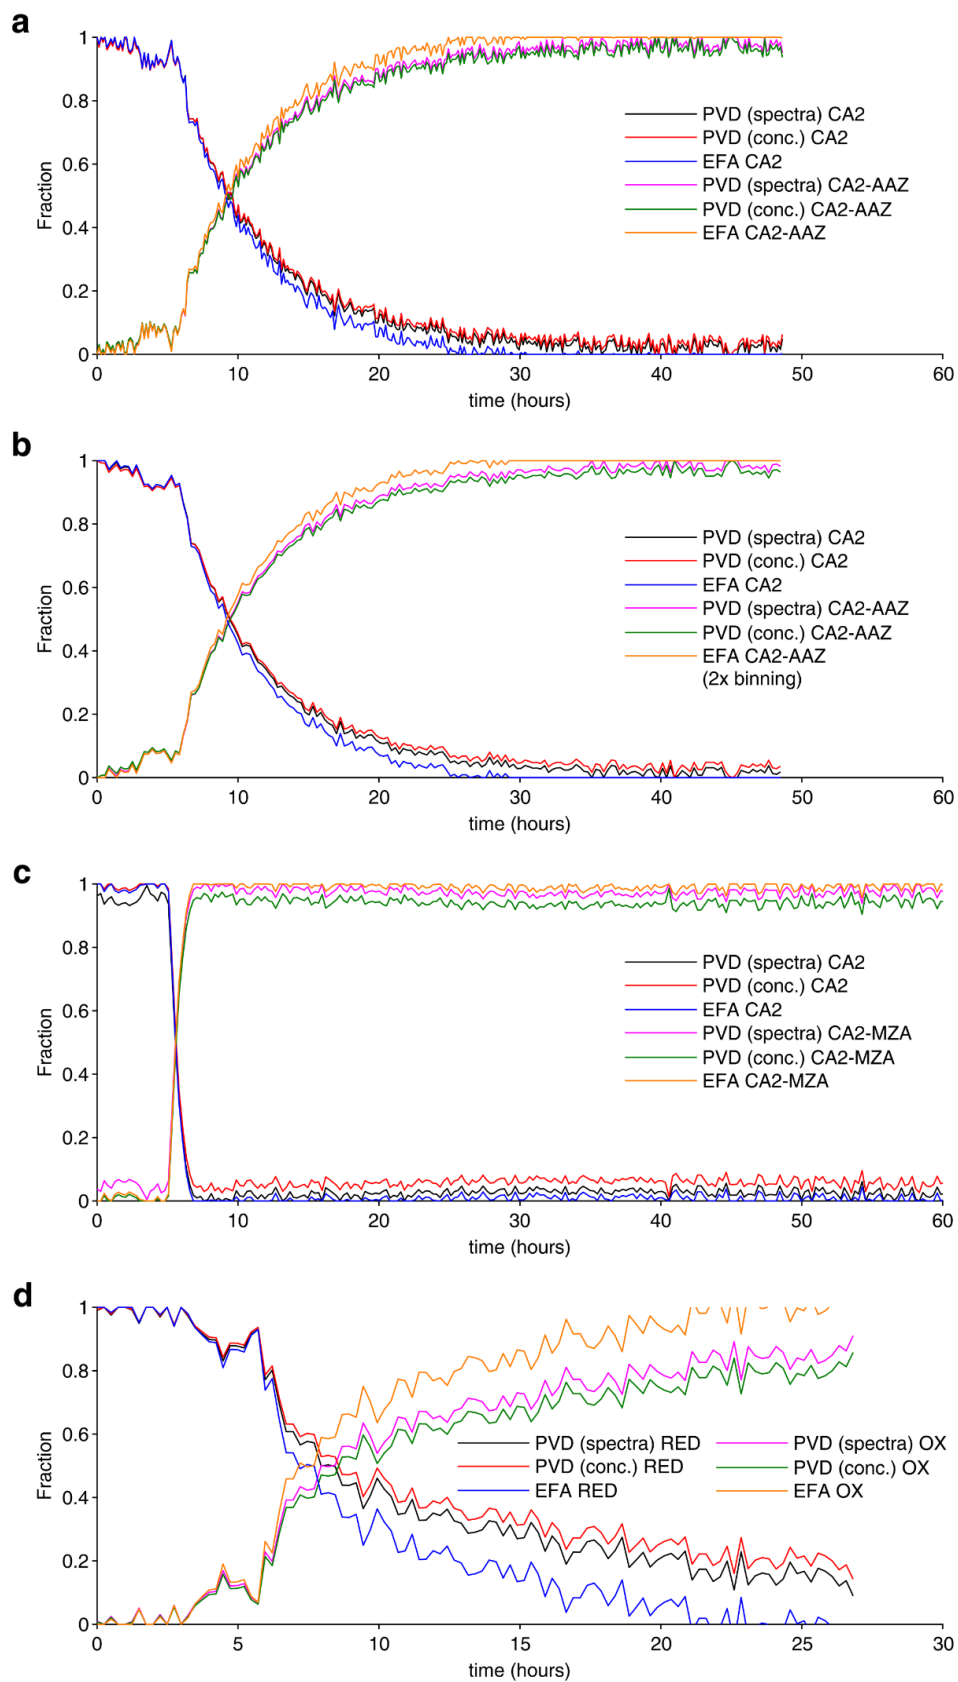

**Figure S6. MCR-ALS with different choice of initial components.** (a-c) Relative concentration profiles of intracellular free and bound CA2 upon addition of (a) AAZ from original spectra, (b) AAZ from 2x binned spectra and (c) MZA. (d) Relative concentration profiles of intracellular disulfide-reduced SOD1 (RED) and disulfide-oxidized SOD1 (OX). The curves were obtained by MCR-ALS analysis using different methods of choice of initial pure components: Purest Variable Detection (PVD) along the ‘spectra’ dimension (black, magenta), PVD along the ‘concentrations’ direction (red, green) and Evolving Factor Analysis (EVA) (blue, orange).
